# Supplementary material
Source: Springer Nature journal article supplement (https://www.springermedizin.de/resource/supplementary/12985_2011_1295_MOESM6_ESM.pdf/9609482)
Supplement: MOESM6 [file 9609482]

|              |                                               |                                         |                                                             |
|--------------|-----------------------------------------------|-----------------------------------------|-------------------------------------------------------------|
|              |                                               | <br>← N-SL2 →                           |                                                             |
|              | 1                                             | 46                                      | 70                                                          |
| APRRSV       | ATGACGTATAGGTGTTGGCTCTATGCCTTGACATTTGTATTGTCA | GGAGCTIGTATCATTGACACAGCCC               | AAAGCTTGCTGCACAGAAACACCCTTCTGTGACAGCCTTCCTTCAGGGGAGTTTAGGGG |
| S-RL-Plasmid | .....                                         | <b>ccc g a c a c a gATTctagtgtcgagg</b> | .....                                                       |
| S-RL-P1      | .....                                         | <b>ccc g a c a c a gATTctagtgtcgagg</b> | .....                                                       |
| S-RL-P5      | .....                                         | <b>ccc g a c a c a gATTctagtgtcgagg</b> | .....                                                       |
| EX-Plasmid   | .....                                         | <b>tGGAGgcGTGGguAca GcCcC.gcCCCa</b>    | .....                                                       |
| EX-P1        | .....                                         | <b>tGGAGgcGTGGguAca GcCcC.gcCCCa</b>    | .....                                                       |
| EX-P5        | .....                                         | <b>tGGAGgcGTGGguAca GcCcC.gcCCCa</b>    | .....                                                       |
| D5-Plasmid   | .....                                         | -----GTGATCATTGACAC-----                | .....                                                       |
| D5-P1        | .....                                         | -----GTGATCATTGACAC-----                | .....                                                       |
| D5-P5        | .....                                         | -----GTGATCATTGACAC-----                | .....                                                       |
